# Supplementary material
Source: PubMed Central journal article supplement (PMC8034612)

# Supplementary Appendix

## Supplement to “Antibiotic use and the development of inflammatory bowel disease: a national case/control study in Sweden”

Long H. Nguyen, M.D.<sup>1,2</sup>, Anne K. Örtqvist, M.D.<sup>3,4</sup>, Yin Cao, Sc.D.<sup>2,6,7</sup>, Tracey G. Simon, M.D.<sup>1,2</sup>, Bjorn Roelstraete<sup>5</sup>, Mingyang Song Sc.D.<sup>1,2,8</sup>, Amit D. Joshi, Ph.D.<sup>1,2</sup>, Kyle D. Staller, M.D.<sup>1,2</sup>, Professor Andrew T. Chan, M.D.<sup>1,2,9,10</sup>, Hamed Khalili, M.D.<sup>1,2</sup>, Ola Olén, M.D.<sup>3,11,12</sup>, Professor Jonas F. Ludvigsson, M.D.<sup>5,13,14,15</sup>

1. Division of Gastroenterology, Massachusetts General Hospital and Harvard Medical School, Boston, MA, USA.
2. Clinical and Translational Epidemiology Unit, Massachusetts General Hospital and Harvard Medical School Boston, MA, USA.
3. Division of Clinical Epidemiology, Karolinska Institutet, Stockholm, Sweden.
4. Department of Obstetrics and Gynecology, Visby Lasarett, Gotland, Sweden.
5. Department of Medical Epidemiology and Biostatistics, Karolinska Institutet, Stockholm, Sweden.
6. Division of Public Health Sciences, Department of Surgery, Washington University School of Medicine, St Louis, MO, USA.
7. Alvin J. Siteman Cancer Centre, Washington University School of Medicine, St Louis, MO, USA.
8. Departments of Epidemiology and Nutrition, Harvard T.H. Chan School of Public Health, Boston, MA, USA.
9. Broad Institute of MIT and Harvard, Cambridge, MA, USA.
10. Department of Immunology and Infectious Disease, Harvard T.H. Chan School of Public Health, Boston, MA, USA.
11. Department of Clinical Science and Education, Karolinska Institutet, Stockholm, Sweden.
12. Sachs' Children and Youth Hospital, Stockholm South General Hospital, Stockholm, Sweden.
13. Department of Paediatrics, Örebro University Hospital, Örebro, Sweden.
14. Division of Epidemiology and Public Health, School of Medicine, University of Nottingham, Nottingham, UK.
15. Department of Medicine, Columbia University College of Physicians and Surgeons, New York, USA.

### Table of Contents

#### Supplementary Tables

|                                                                                                                                                                                       |   |
|---------------------------------------------------------------------------------------------------------------------------------------------------------------------------------------|---|
| <i>Supplementary Table 1: Histopathology and International Classification of Disease (ICD) codes used to define the study population</i>                                              | 2 |
| <i>Supplementary Table 2: Antibiotic classification by class and coverage</i>                                                                                                         | 3 |
| <i>Supplementary Table 3: Patient characteristics at the time of inflammatory bowel disease diagnosis and their matched general population controls, (IBD vs. control), 2007-2016</i> | 5 |
| <i>Supplementary Table 5: Sibling characteristics at the time of their case sibling's inflammatory bowel disease diagnosis, 2007-2016</i>                                             | 7 |

#### Supplementary Figures

|                                                                         |   |
|-------------------------------------------------------------------------|---|
| <i>Supplementary Figure 1: Description of study period with lead-in</i> | 8 |
|-------------------------------------------------------------------------|---|

## Supplementary Tables

**Supplementary Table 1: Histopathology and International Classification of Disease (ICD) codes used to define the study population**

|                                                           |                                               | Ulcerative colitis (UC) | Crohn's disease (CD)                 | IBD-unclassified (IBD-U) |
|-----------------------------------------------------------|-----------------------------------------------|-------------------------|--------------------------------------|--------------------------|
| <b>Histopathology</b>                                     | <b>Anatomic location</b>                      | T65, T66, T67, T68      | T62, T63, T64,<br>T65, T66, T67, T68 | T65, T66, T67, T68       |
|                                                           | <b>Histologic features (morphology codes)</b> |                         | M41, M42, M43, M44, M46300, M47      |                          |
| <b>Diagnostic codes from the Swedish Patient Register</b> | <b>Diagnostic code</b>                        | D6255                   | D6216                                | D6214                    |
|                                                           | <b>ICD-7</b>                                  | 572.20, 572.21          | 572.00, 572.09                       | NA                       |
|                                                           | <b>ICD-8</b>                                  | 563.10, 563.99, 569.02  | 563                                  | NA                       |
|                                                           | <b>ICD-9</b>                                  | 556                     | 555                                  | NA                       |
|                                                           | <b>ICD-10</b>                                 | K51                     | K50                                  | K52.3                    |

Abbreviations: ICD - international classification of disease

**Supplementary Table 2: Antibiotic classification by class and coverage**

| Antibiotics class                            | Spectrum |
|----------------------------------------------|----------|
| tetracyclines                                |          |
| doxycycline                                  | broad    |
| lymecycline                                  | broad    |
| oxytetracycline                              | broad    |
| tetracycline                                 | broad    |
| minocycline                                  | broad    |
| tigecycline                                  | broad    |
| beta-lactam antibacterials and penicillins   |          |
| ampicillin                                   | broad    |
| pivampicillin                                | broad    |
| amoxicillin                                  | broad    |
| pivmecillinam                                | narrow   |
| piperacillin                                 | broad    |
| benzylpenicillin                             | narrow   |
| phenoxymethylpenicillin                      | narrow   |
| benzathine benzylpenicillin                  | narrow   |
| dicloxacillin                                | narrow   |
| cloxacillin                                  | narrow   |
| flucloxacillin                               | narrow   |
| amoxicillin and beta-lactamase inhibitor     | broad    |
| piperacillin and beta-lactamase inhibitor    | broad    |
| other beta-lactam antibacterials             |          |
| cefalexin                                    | narrow   |
| cefadroxil                                   | narrow   |
| cefoxitin                                    | broad    |
| cefuroxime                                   | broad    |
| loracarbef                                   | broad    |
| cefotaxime                                   | broad    |
| ceftazidime                                  | broad    |
| ceftriaxone                                  | broad    |
| cefepodoxime                                 | broad    |
| ceftibuten                                   | broad    |
| ceftriaxone, combinations                    | broad    |
| aztreonam                                    | broad    |
| meropenem                                    | broad    |
| ertapenem                                    | broad    |
| imipenem and cilastatin                      | broad    |
| Sulfonamides and trimethoprim                |          |
| trimethoprim                                 | broad    |
| sulfadiazine                                 | broad    |
| sulfamethoxazole and trimethoprim            | broad    |
| Macrolides, lincosamides, and streptogramins |          |

|                |        |
|----------------|--------|
| erythromycin   | narrow |
| roxithromycin  | narrow |
| clarithromycin | narrow |
| azithromycin   | narrow |
| telithromycin  | broad  |
| clindamycin    | narrow |
| pristinamycin  | broad  |

#### Aminoglycoside antibacterials

|            |       |
|------------|-------|
| tobramycin | broad |
| gentamicin | broad |
| amikacin   | broad |
| netilmicin | broad |

#### Quinolone antibacterials

|               |       |
|---------------|-------|
| ofloxacin     | broad |
| ciprofloxacin | broad |
| norfloxacin   | broad |
| levofloxacin  | broad |
| moxifloxacin  | broad |

#### Other Antibacterials

|                |        |
|----------------|--------|
| vancomycin     | narrow |
| teicoplanin    | narrow |
| colistin       | broad  |
| fusidic acid   | narrow |
| metronidazole  | broad  |
| nitrofurantoin | narrow |
| fosfomycin     | broad  |
| methenamine    | narrow |
| linezolid      | broad  |

---

**Supplementary Table 3: Patient characteristics at the time of inflammatory bowel disease diagnosis and their matched general population controls, (IBD vs. control), 2007-2016**

|                                          | Cases<br><i>n</i> =23,982 <sup>#</sup> | Controls<br><i>n</i> =117,827 |
|------------------------------------------|----------------------------------------|-------------------------------|
| <b>Age, years</b>                        | 35 [22-54]                             | 35 [22-54]                    |
| <18                                      | 3,461 (15)                             | 17,699 (15)                   |
| 18-24                                    | 3,997 (17)                             | 20,421 (17)                   |
| 25-34                                    | 4,558 (19)                             | 22,785 (19)                   |
| 35-44                                    | 3,198 (13)                             | 15,843 (13)                   |
| 45-54                                    | 2,719 (11)                             | 13,451 (12)                   |
| 55-64                                    | 2,957 (12)                             | 13,487 (12)                   |
| ≥65                                      | 3,092 (13)                             | 14,141 (12)                   |
| <b>Male sex, <i>n</i> (%)</b>            | 12,616 (52)                            | 62,010 (52)                   |
| <b>County of residence, <i>n</i> (%)</b> |                                        |                               |
| Northern Sweden                          | 2,017 (8)                              | 9,926 (8)                     |
| Southeastern Sweden                      | 2,758 (12)                             | 13,572 (12)                   |
| Southern Sweden                          | 4,554 (19)                             | 22,390 (19)                   |
| Stockholm-Gotland                        | 5,134 (21)                             | 25,229 (21)                   |
| Uppsala-Örebro                           | 5,124 (21)                             | 25,216 (21)                   |
| Western Sweden                           | 4,250 (18)                             | 20,922 (18)                   |
| Unknown                                  | 155 (1)                                | 572 (1)                       |
| <b>Education, <i>n</i> (%)</b>           |                                        |                               |
| ≤9 years                                 | 4,395 (18)                             | 21,030 (18)                   |
| 10-12 years                              | 10,653 (44)                            | 50,542 (43)                   |
| ≥13 years                                | 8,035 (35)                             | 41,092 (35)                   |
| Unknown                                  | 899 (4)                                | 5,163 (4)                     |
| <b>Number of encounters*, <i>n</i></b>   |                                        |                               |
| Inpatient                                | 2 [0-4]                                | 1 [0-3]                       |
| Outpatient                               | 5 [2-12]                               | 3 [1-9]                       |
| <b>Calendar year</b>                     |                                        |                               |
| 2007-2009                                | 7,013 (29)                             | 34,449 (29)                   |
| 2010-2013                                | 10,671 (44)                            | 52,373 (44)                   |
| 2014-2016                                | 6,298 (26)                             | 31,005 (26)                   |

Values are median [IQR] or absolute figures (percentages). Polytomous variables may not sum to 100% due to rounding.

<sup>#</sup> includes ulcerative colitis, Crohn's disease, and IBD-unclassified

\* calculated the number of inpatient and outpatient encounters (continuous) for each participant during the study period up until the time of matching

**Supplementary Table 4.** Overall antibiotic use and inflammatory bowel disease comparing cases and their matched general population controls by age group, 2007-2016

|                                     | Cumulative antibiotic use |                   |                   |                   | <i>P</i> -trend |
|-------------------------------------|---------------------------|-------------------|-------------------|-------------------|-----------------|
|                                     | No use                    | 1 dispensation    | 2 dispensations   | ≥3 dispensations  |                 |
| <b>&lt;18 years</b>                 |                           |                   |                   |                   |                 |
| Cases, <i>n</i> (%)                 | 1,593 (35)                | 1,711 (38)        | 457 (10)          | 795 (17)          |                 |
| Controls, <i>n</i> (%)              | 8,734 (49)                | 3,680 (21)        | 1,939 (11)        | 3,346 (19)        |                 |
| Multivariable OR (95% CI)‡          | 1.0 (ref)                 | 1.04 (0.94, 1.15) | 1.26 (1.12, 1.42) | 1.25 (1.12, 1.40) | <0-0001         |
| <b>18-39 years</b>                  |                           |                   |                   |                   |                 |
| Cases, <i>n</i> (%)                 | 4,380 (42)                | 2,160 (20)        | 1,345 (13)        | 2,566 (25)        |                 |
| Controls, <i>n</i> (%)              | 25,349 (49)               | 10,872 (21)       | 5,655 (11)        | 9,893 (19)        |                 |
| Multivariable OR (95% CI)‡          | 1.0 (ref)                 | 1.15 (1.08, 1.21) | 1.38 (1.29, 1.48) | 1.46 (1.37, 1.55) | <0-0001         |
| <b>40-59 years</b>                  |                           |                   |                   |                   |                 |
| Cases, <i>n</i> (%)                 | 2,119 (40)                | 1,108 (51)        | 668 (13)          | 1,402 (26)        |                 |
| Controls, <i>n</i> (%)              | 12,662 (49)               | 5,600 (21)        | 2,896 (11)        | 4,971 (19)        |                 |
| Multivariable OR (95% CI)‡          | 1.0 (ref)                 | 1.19 (1.10, 1.29) | 1.40 (1.27, 1.55) | 1.61 (1.48, 1.76) | <0-0001         |
| <b>≥60 years</b>                    |                           |                   |                   |                   |                 |
| Cases, <i>n</i> (%) <sup>4678</sup> | 1,585 (34)                | 834 (18)          | 617 (13)          | 1,642 (35)        |                 |
| Controls, <i>n</i> (%)              | 9,495 (43)                | 4,712 (21)        | 2,662 (12)        | 5,361 (24)        |                 |
| Multivariable OR (95% CI)‡          | 1.0 (ref)                 | 1.09 (0.99, 1.19) | 1.43 (1.28, 1.69) | 1.81 (1.66, 1.98) | <0-0001         |

Cumulative dispensations accrued from study baseline up until one year prior to diagnosis/match.

Abbreviations: OR - odds ratio, CI - confidence interval

<sup>#</sup>Includes ulcerative colitis, Crohn's disease, and IBD-unspecified

<sup>†</sup>Conditional logistic regression matched for age, sex, calendar year, and county

<sup>‡</sup>Further adjusted for number of inpatient and outpatient encounters and education level

\*Calculated using the median of each category as a continuous variable .

**Supplementary Table 5: Sibling characteristics at the time of their case sibling's inflammatory bowel disease diagnosis, 2007-2016**

|                                   | <b>IBD</b><br><i>n</i> =16,353 | <b>Non-IBD siblings</b><br><i>n</i> =28,732 |
|-----------------------------------|--------------------------------|---------------------------------------------|
| <b>Age, years</b>                 | 31 [20-49]                     | 33 [21-53]                                  |
| <18                               | 2,898 (18)                     | 4,827 (17)                                  |
| 18-24                             | 3,289 (20)                     | 5,028 (18)                                  |
| 25-34                             | 3,182 (19)                     | 5,222 (18)                                  |
| 35-44                             | 2,083 (13)                     | 3,726 (13)                                  |
| 45-54                             | 1,787 (11)                     | 3,615 (13)                                  |
| 55-64                             | 1,827 (11)                     | 3,620 (12)                                  |
| ≥65                               | 1,287 (8)                      | 2,694 (9)                                   |
| <b>Male sex, n (%)</b>            | 8,714 (53)                     | 14,570 (51)                                 |
| <b>County of residence, n (%)</b> |                                |                                             |
| Northern Sweden                   | 1,446 (9)                      | 2,741 (10)                                  |
| Southeastern Sweden               | 1,984 (12)                     | 3,484 (12)                                  |
| Southern Sweden                   | 3,092 (19)                     | 5,454 (19)                                  |
| Stockholm-Gotland                 | 3,210 (20)                     | 5,315 (18)                                  |
| Uppsala-Örebro                    | 3,597 (22)                     | 6,396 (22)                                  |
| Western Sweden                    | 2,925 (18)                     | 5,154 (18)                                  |
| Unknown                           | 99 (1)                         | 188 (1)                                     |
| <b>Education, n (%)</b>           |                                |                                             |
| <9 years                          | 2,632 (16)                     | 5,023 (18)                                  |
| 10-12 years                       | 7,536 (46)                     | 13,047 (45)                                 |
| ≥13 years                         | 5,568 (34)                     | 9,143 (32)                                  |
| Unknown                           | 617 (4)                        | 1,519 (5)                                   |
| <b>Number of encounters, n</b>    |                                |                                             |
| Inpatient                         | 1 [0-4]                        | 1 [0-3]                                     |
| Outpatient                        | 5 [2-11]                       | 4 [1-10]                                    |
| <b>Calendar year</b>              |                                |                                             |
| 2007-2009                         | 4,709 (29)                     | 8,319 (29)                                  |
| 2010-2013                         | 7,293 (44)                     | 12,789 (44)                                 |
| 2014-2016                         | 4,351 (26)                     | 7,624 (27)                                  |

Values are median [IQR] or absolute figures (percentages). Polytomous variables may not sum to 100% due to rounding. Distributions may differ between (unmatched) groups. IBD cases without siblings not shown.

## Supplementary Figures

Supplementary Figure 1: Description of study period with lead-in

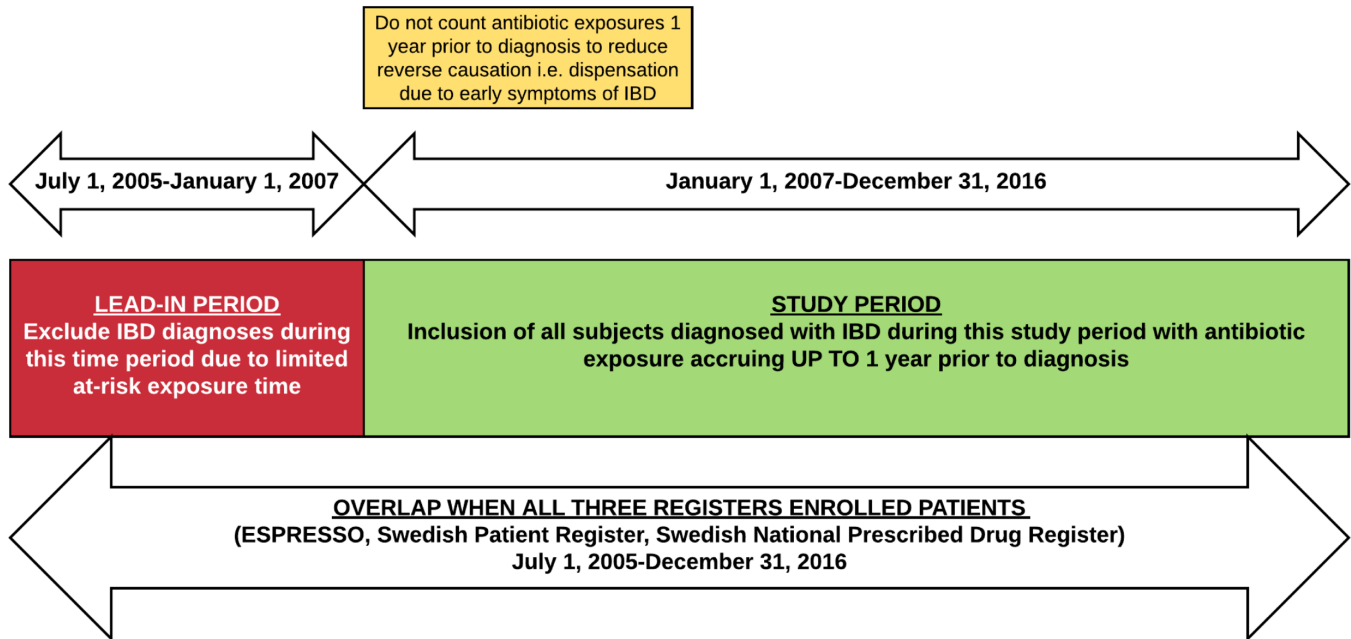

Supplement: NIHMS1688237-supplement-Suppl__Materials.pdf [file NIHMS1688237-supplement-Suppl__Materials.pdf]
